# Supplementary material
Source: Springer Nature journal article supplement (https://www.springermedizin.de/resource/supplementary/12981_2013_332_MOESM1_ESM.pdf/9603606)
Supplement: MOESM1 [file 9603606]

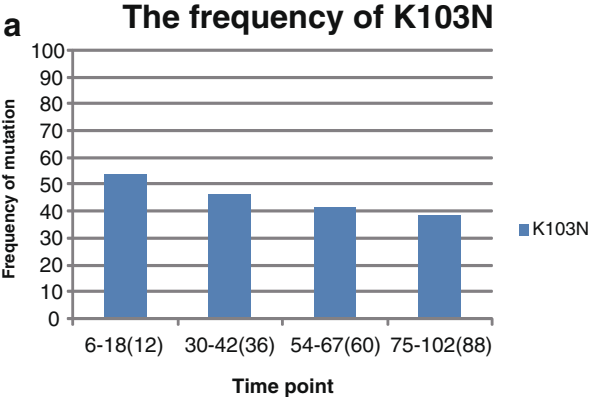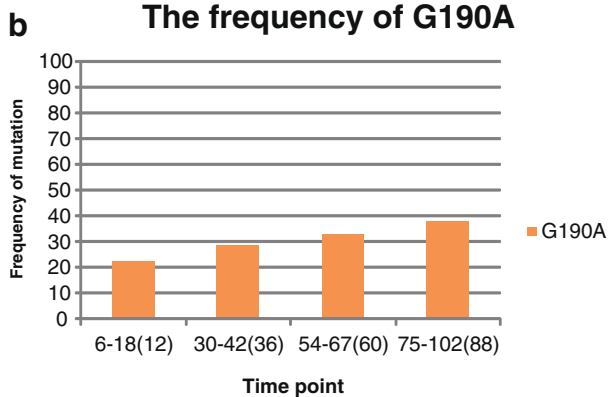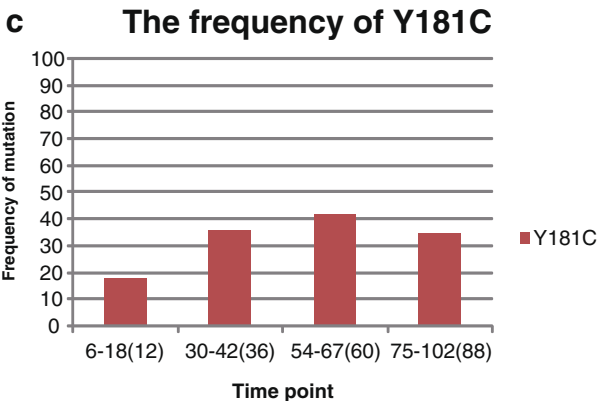

K103N: Correlation coefficient= $-0.972$   $p=0.028$   
 Regression analysis:  
 estimate frequency= $-4.981$   $p=0.028$

Y181C: Correlation coefficient= $0.691$   $p=0.310$   
 Regression analysis:  
 estimate frequency= $2.21$   $p=0.309$

G190A: Correlation coefficient= $0.9928$   $p=0.007$   
 Regression analysis:  
 estimate frequency= $4.97$   $p=0.007$

K101E and G190A correlated rate  
 in four time points:  
 3/9, 4/16, 7/23, 10/27
